# Supplementary material for: Poly(N,N-dimethylacrylamide-octadecyl acrylate)-clay hydrogels with high mechanical properties and shape memory ability
Source: Royal Society of Chemistry journal article supplement (doi:10.1039/c8ra01167b), 2018-01-01
Supplement: c8ra01167b1.pdf [file c8ra01167b1.pdf]

***Supporting Information***

**Poly(*N,N*-Dimethylacrylamide - Octadecyl Acrylate) - Clay  
Hydrogels with High Mechanical Properties and Shape Memory  
Ability**

Feng Wang<sup>a,c</sup>, Xueyong Yong<sup>a,b,c</sup>, Jianping Deng<sup>b,c</sup>, and Youping Wu<sup>a,c,\*</sup>

<sup>a</sup>State Key Laboratory of Organic-Inorganic Composites, Beijing University of Chemical Technology, Beijing 100029, China

<sup>b</sup>State Key Laboratory of Chemical Resource Engineering, Beijing University of Chemical Technology, Beijing 100029, China

<sup>c</sup>College of Materials Science and Engineering, Beijing University of Chemical Technology, Beijing 100029, China

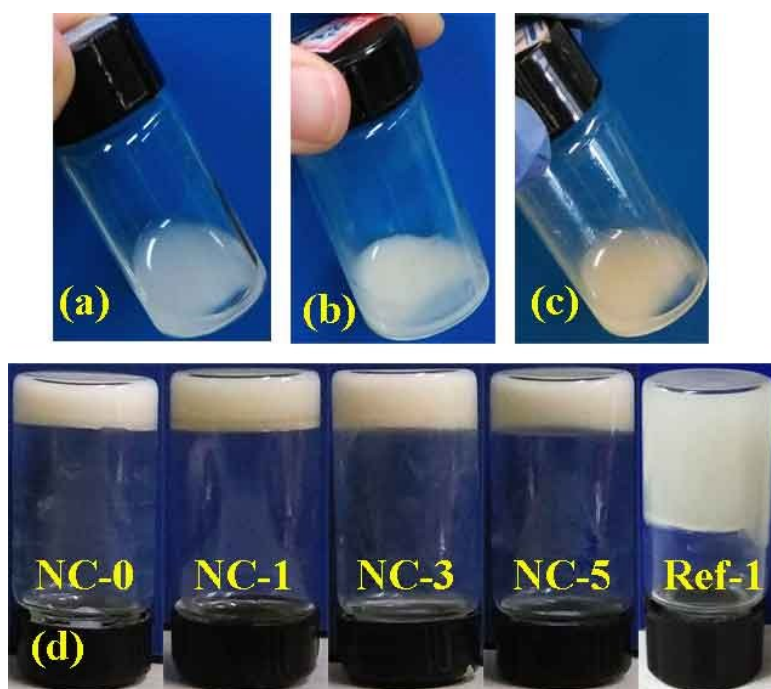

**Figure S1.** Typical photographs of (a) clay dissolved in deionized water at room temperature; (b) gelatin emulsified octadecyl acrylate in clay solution; (c) after DMA addition in mixed solution; (d) hydrogels

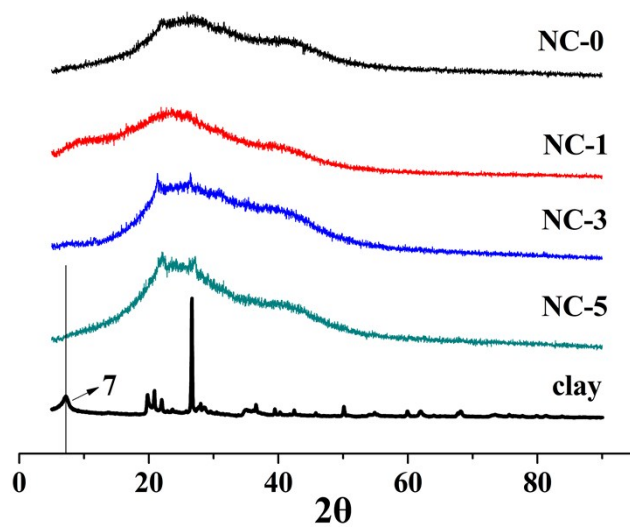

**Figure S2.** X-ray diffraction patterns of clay and three hydrogels.

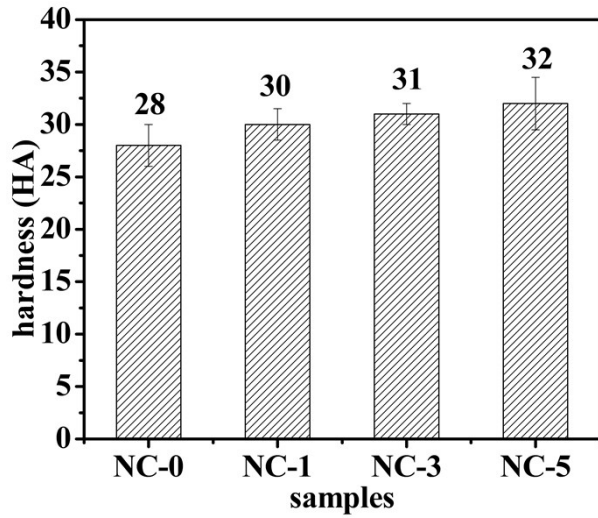

Figure S3. Shore hardness of the hydrogels with different clay contents.

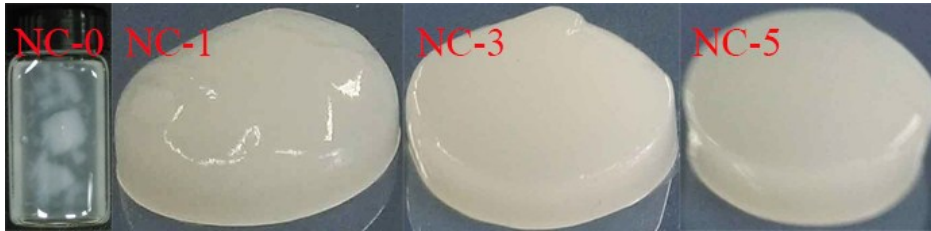

Figure S4. The shape of hydrogels after 30 days in pH = 7.4 PBS, 37 °C. (After immersing for 5 days, NC-0 hydrogel became a turbid solution.)

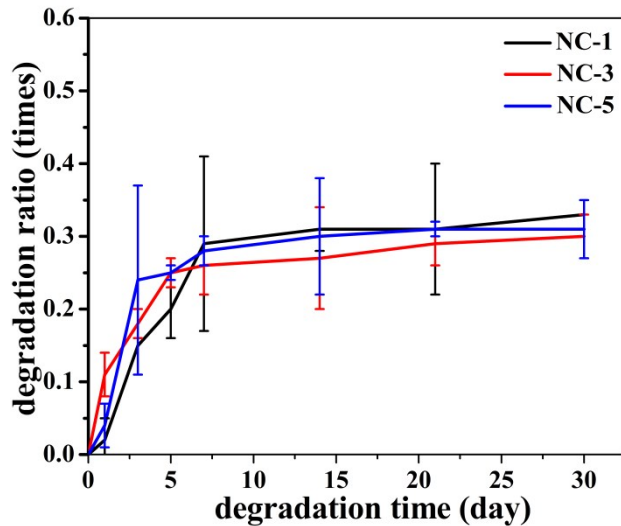

Figure S5. Degradation ratio of hydrogels. (Degradation ratio =  $(W_o - W_d)/W_o$ ,  $W_o$  and  $W_d$  were the dry hydrogel weights before and after degradation, respectively.)

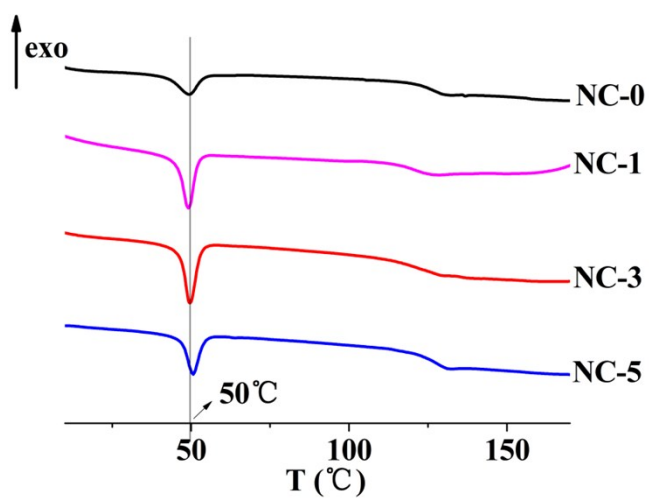

**Figure S6.** DSC curves of dried hydrogels.

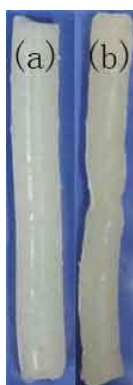

**Figure S7.** (a) permanent rod shape, (b) temporary spiral shape of Ref-1 hydrogel.
